# Supplementary material for: Recovery of tetrodotoxin from pufferfish viscera extract by amine-functionalized magnetic nanocomposites
Source: Royal Society of Chemistry journal article supplement (doi:10.1039/d3ra02166a), 2023-01-01
Supplement: d3ra02166a1.pdf [file d3ra02166a1.pdf]

## Electronic Supplementary Information (ESI)

### Recovery of tetrodotoxin from pufferfish viscera extract by amine-functionalized magnetic nanocomposites

Dang Thuan Tran<sup>a,\*</sup>, Cam Van T. Do<sup>b</sup>, Cuc T. Dinh<sup>a</sup>, Mai T. Dang<sup>a</sup>, Khanh Hy Le Ho<sup>c</sup>, Truong Giang Le<sup>a,d</sup>, Viet Ha Dao<sup>c,d</sup>

*<sup>a</sup>Institute of Chemistry, Vietnam Academy of Science and Technology (VAST), 18 Hoang Quoc Viet, Cau Giay, Hanoi 100000, Viet Nam*

*<sup>b</sup>HaUI Institute of Technology, Hanoi University of Industry (HaUI), 298 Cau Dien, Bac Tu Liem, Hanoi, Viet Nam*

*<sup>c</sup>Institute of Oceanography, Vietnam Academy of Science and Technology (VAST), 01 Cau Da St., Nha Trang City 650000, Viet Nam*

*<sup>d</sup>Graduate University of Science and Technology (GUST), Vietnam Academy of Science and Technology (VAST), 18 Hoang Quoc Viet, Cau Giay, Hanoi 100000, Viet Nam*

\*Corresponding author at: Institute of Chemistry, Institute of Chemistry, Vietnam Academy of Science and Technology

E-mail: [tdangthuan@ich.vast.vn](mailto:tdangthuan@ich.vast.vn) (D.T. Tran)

## Verification of HILIC-MS/MS methodology

The reliability of HILIC-MS/MS methodology for quantitative determination of 4epi-TTX, TTX and Anh-TTX in pufferfish viscera extract was evaluated in terms of linear range, correlation coefficients ( $R^2$ ), the limits of detection (LODs) and quantification (LOQs). The real samples were purified according to the procedure that was described in **Section 2.6**. Calibrations curves were established by preparation of series of concentrations (0.1 to 10 mg/L) of the three analytes in acetonitrile/water/formic acid (700:300:0.1 v/v/v) solvent. The linear ranges for the three analytes were in the range of 0.1 - 5 mg/L with correlation efficient of 0.9992 - 0.9996 (**Fig. S1-S3 and Table S1**). Limit of detection (LOD) and quantification (LOQ) correspond to 3 and 10 times the signal-to-noise ratio for the three analytes were 0.010 - 0.012 mg/L and 0.041 - 0.054 mg/L (**Table S1**), respectively.

Moreover, the accuracy of the HILIC-MS/MS method was validated from spiking the three analytes at three fortification levels (e.g., 0.5, 1, 1.5 mg/L) (**Table S2**). The results showed that recoveries of the three analytes from spiked samples were determined between 95.7 and 103.4% with RSD ranging from 0.97 to 2.21% (**Table S2**), indicating that the HILIC-MS/MS methodology in quantification of 4epi-TTX, TTX and Anh-TTX in pufferfish viscera extract was highly precise.

## Standard curves

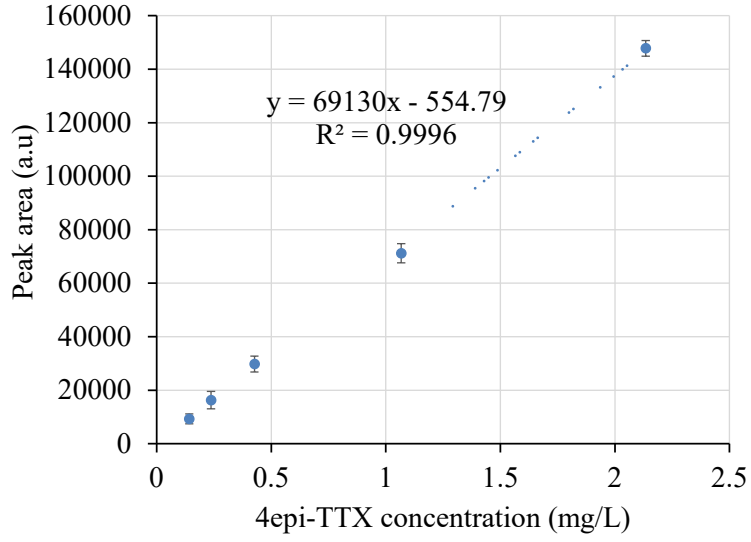

**Fig. S1.** Standard curve for 4epi-TTX.

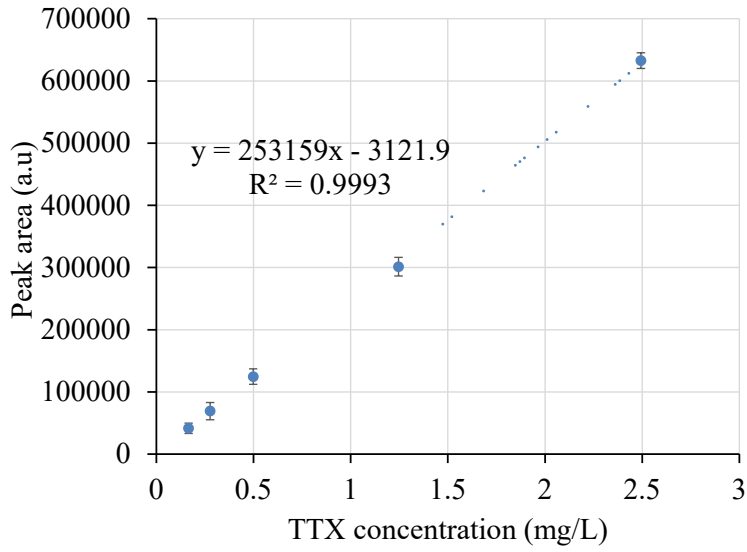

**Fig. S2.** Standard curve for TTX.

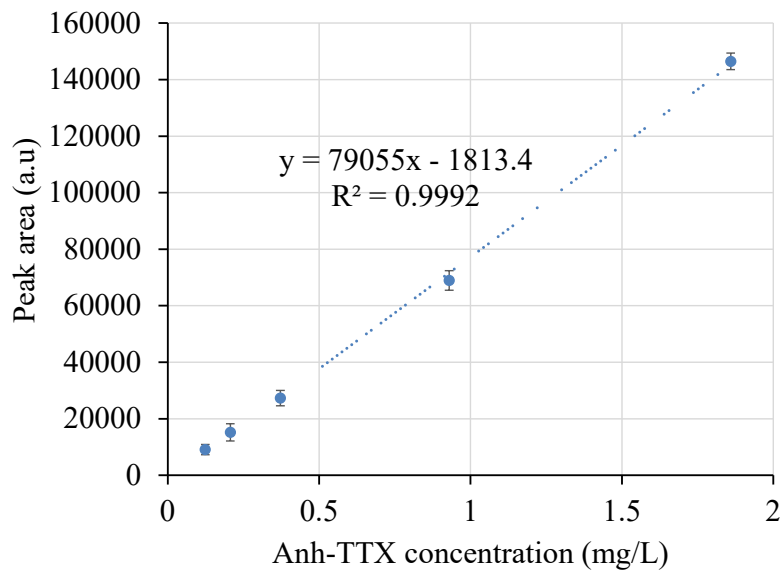

**Fig. S3.** Standard curve for Anh-TTX.

**Table S1.** Linear range, regression coefficient, and the limits of detection and quantification of 4epi-TTX, TTX and Anh-TTX (n = 5).

| Analytes | HILIC-MS/MS methodology |                |            |            |
|----------|-------------------------|----------------|------------|------------|
|          | Linearity (mg/L)        | R <sup>2</sup> | LOD (mg/L) | LOQ (mg/L) |
| 4epi-TTX | 0.1 - 5                 | 0.9996         | 0.010      | 0.054      |
| TTX      | 0.1 - 5                 | 0.9993         | 0.012      | 0.041      |
| Anh-TTX  | 0.1 - 5                 | 0.9992         | 0.011      | 0.047      |

**Table S2.** Accuracy of the HILIC-MS/MS methodology for the three analytes in real samples (pufferfish viscera extract).

| Analytes | 4epi-TTX                 |                    | TTX                                          |                    | Anh-TTX                                      |                    |
|----------|--------------------------|--------------------|----------------------------------------------|--------------------|----------------------------------------------|--------------------|
|          | Fortified content (mg/L) | Recovery (%) (n=5) | Inter-day precision (RSD, %) Intra-day (n=5) | Recovery (%) (n=5) | Inter-day precision (RSD, %) Intra-day (n=5) | Recovery (%) (n=5) |
| 0        | ND                       | 1.37               | ND                                           | 0.98               | ND                                           | 1.76               |
| 0.5      | 99.5                     | 1.23               | 96.8                                         | 0.97               | 100.4                                        | 1.07               |
| 1.0      | 95.7                     | 2.18               | 102.3                                        | 1.52               | 96.2                                         | 2.21               |
| 1.5      | 103.4                    | 1.25               | 98.1                                         | 2.04               | 98.5                                         | 1.72               |

ND: Not determined
